# Supplementary material
Source: PubMed Central journal article supplement (PMC4968759)
Supplement: pnas.1607074113.sapp.pdf [file pnas.1607074113.sapp.pdf]

## Supporting Information (SI Appendix)

### COP1 is required for UV-B-induced nuclear accumulation of the UVR8 photoreceptor

Ruohe Yin, Mariya Y. Skvortsova, Sylvain Loubéry and Roman Ulm

Supplemental Figures S1 – S11

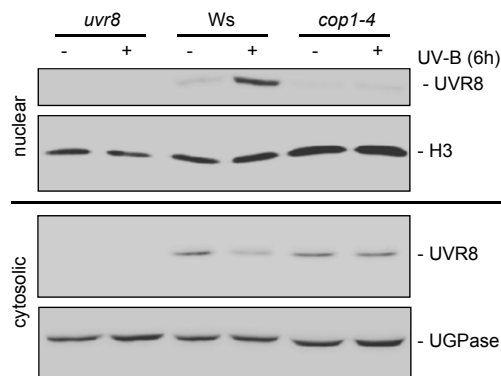

**Fig. S1.** Immunoblot analysis of UVR8, histone H3 and UGPase in nuclear (*upper*) and cytosolic fractions (*lower*) of *uvr8-7*, wild-type (Ws), and *cop1-4* in the Ws background grown in white light with UV-B for 6 h or not.

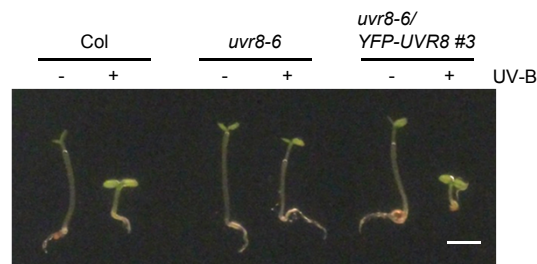

**Fig. S2.** Genetic complementation of the *uvr8-6* UV-B hypocotyl phenotype by *Pro<sub>35S</sub>::YFP-UVR8*. Representative 4-day-old seedlings of wild-type (Col), *uvr8-6*, and the *uvr8-6/Pro<sub>35S</sub>::YFP-UVR8* #3 (*uvr8-6/Pro<sub>35S</sub>::YFP-UVR8* #3) grown in white light (-) or white light supplemented with narrowband UV-B (+). Bar = 2 mm.

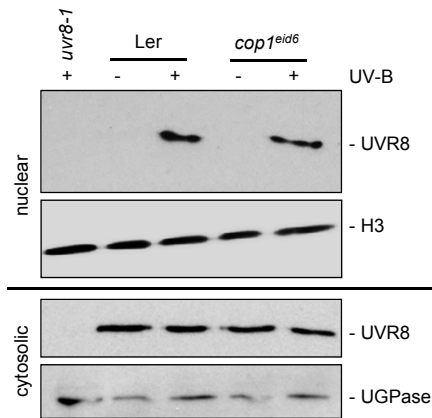

**Fig. S3.** Immunoblot analysis of UVR8, histone H3 and UGPase in nuclear (upper) and cytosolic fractions (lower) of *uvr8-1*, wild-type (Ler), and *cop1<sup>eid6</sup>* grown in white light without or with UV-B for 24 h.

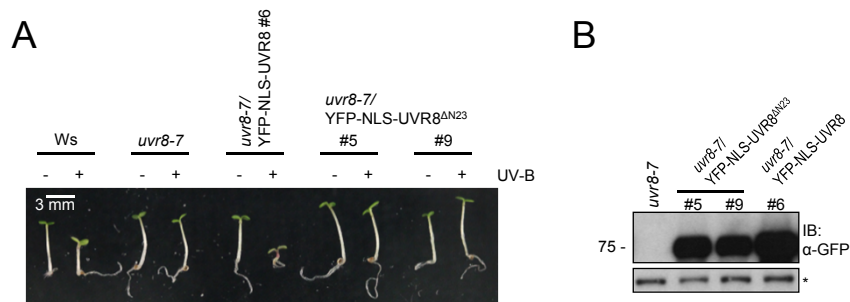

**Fig. S4.** Expression of UVR8<sup>ΔN23</sup> cannot restore hypocotyl growth inhibition under UV-B in *uvr8-7*. (A) Representative 4-day-old seedlings of wild-type (Ws), *uvr8-7*, *uvr8-7/Pro<sub>35S</sub>:YFP-UVR8* line #6 and *uvr8-7/Pro<sub>35S</sub>:YFP-UVR8<sup>ΔN23</sup>* lines #5 and #9 grown in white light (-) or white light supplemented with narrow band UV-B (+). (B) Immunoblot analysis of YFP-NLS-UVR8<sup>ΔN23</sup> and YFP-NLS-UVR8 protein levels in *uvr8-7*, *uvr8-7/Pro<sub>35S</sub>:YFP-UVR8<sup>ΔN23</sup>* lines #5 and #9 and *uvr8-7/Pro<sub>35S</sub>:YFP-UVR8* line #6 grown in white light for four days.

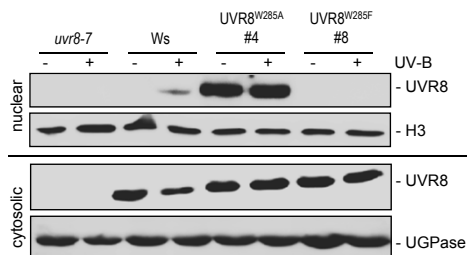

**Fig. S5.** UVR8<sup>W285F</sup> does not accumulate in the nucleus in response to UV-B. Immunoblot analyses of UVR8, histone H3 and UGPase nuclear (upper) and cytosolic proteins (lower) of 7-day-old *uvr8-7*, wild-type (Ws), *uvr8-7/Pro<sub>35S</sub>:UVR8<sup>W285A</sup>* line #4 (UVR8<sup>W285A</sup> #4), and *uvr8-7/Pro<sub>35S</sub>:UVR8<sup>W285F</sup>* line #8 (UVR8<sup>W285F</sup> #8) treated with 9 h narrowband UV-B or not.

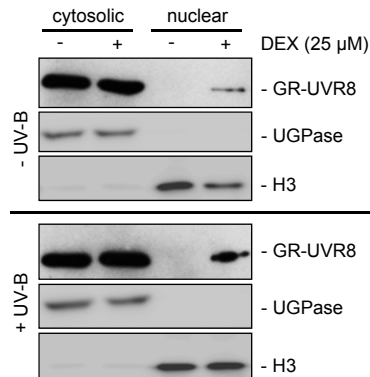

**Fig. S6.** DEX triggers nuclear translocation of GR-UVR8 fusion protein in transgenic plants. Seven-day-old *uvr8-7/Pro<sub>35S</sub>:GR-UVR8* line #1 seedlings were grown in white light with UV-B or not and then treated with 10 μM Dex or an equal amount of ethanol in MS medium for 6 h.

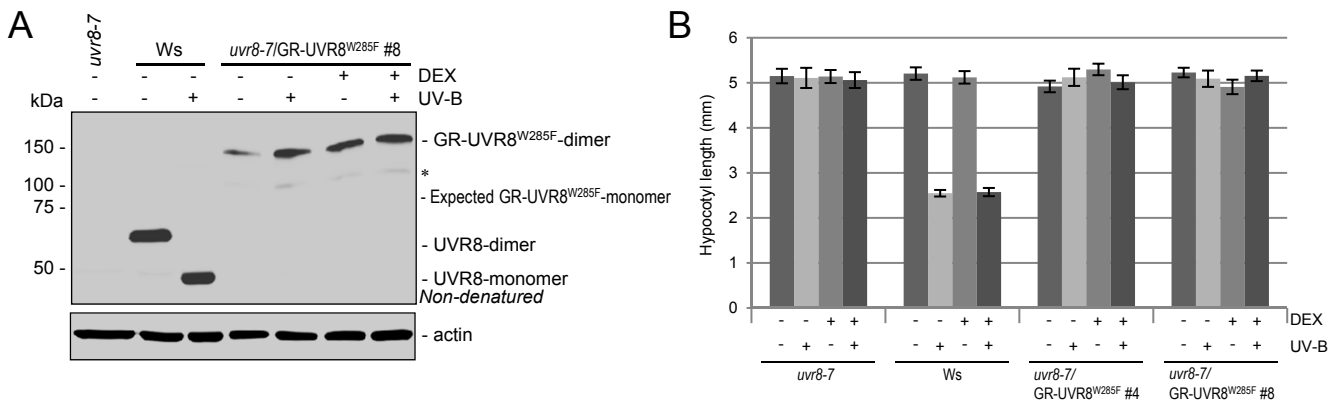

**Fig. S7.** GR-UVR8<sup>W285F</sup> is not active in Arabidopsis seedlings. (A) UVR8 and GR-UVR8<sup>W285F</sup> homodimers and monomers in non-heat-denatured protein extracts of 4-day-old *uvr8-7*, wild-type (Ws), and *uvr8-7/Pro<sub>35S</sub>:GR-UVR8<sup>W285F</sup>* line #8 seedlings. The latter seedlings were treated with 10 μM dexamethasone (Dex) or ethanol (mock). Seedlings were irradiated for 15 min with (+) or without (-) broadband UV-B. Actin was the loading control. (B) Hypocotyl lengths of 4-day-old seedlings grown in white light or in white light supplemented with narrowband UV-B and treated with 10 μM dexamethasone (+Dex) or ethanol (-Dex); means with SE, *n*=19.

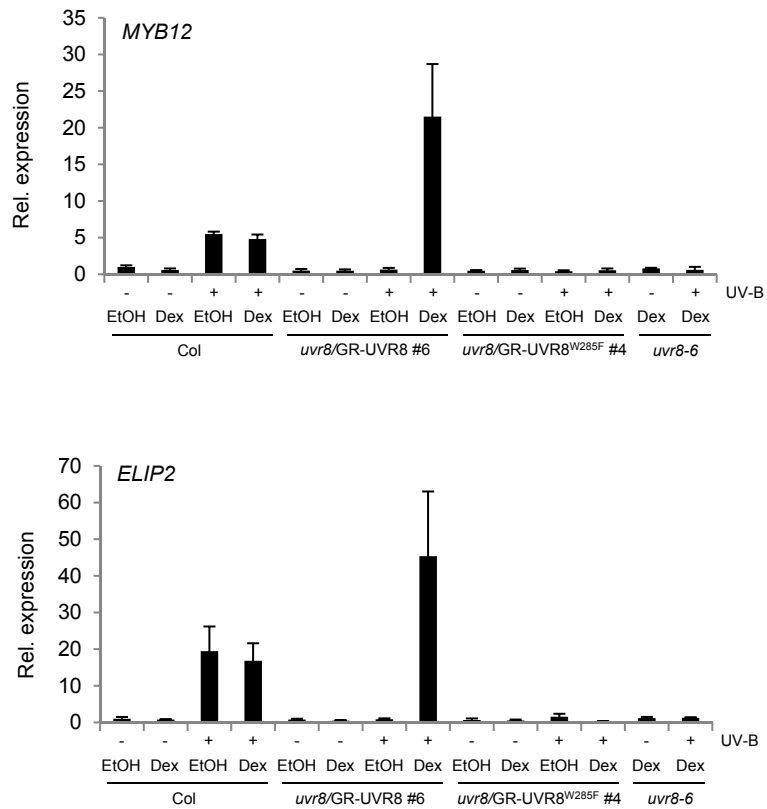

**Fig. S8.** Quantitative RT-PCR analysis of *MYB12* and *ELIP2* mRNA in 7-day-old seedlings incubated for 3 h in half-strength MS (Ctrl.) with 10  $\mu$ M dexamethasone (Dex) or ethanol (EtOH) before irradiation for 2 h with narrowband UV-B (+) or without (-). Data for Col with ethanol treatment were set to 1; means with SE;  $n=3$ .

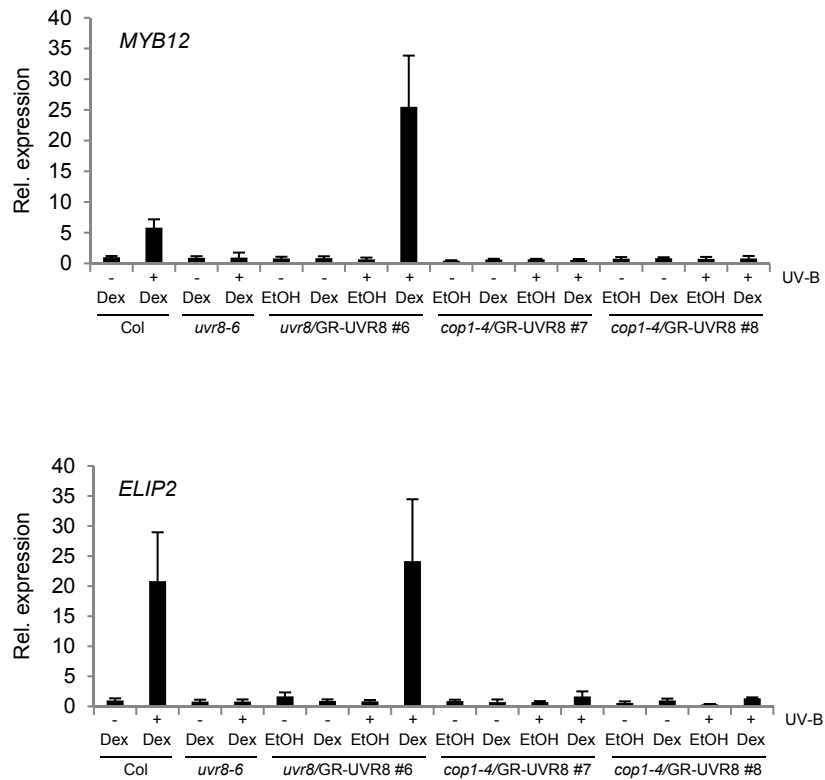

**Fig. S9.** Quantitative RT-PCR analysis of *MYB12* and *ELIP2* mRNA in 7-day-old seedlings of *uvr8-6/Pro<sub>35S</sub>:GR-UVR8* line #6 and *cop1-4/Pro<sub>35S</sub>:GR-UVR8* lines #7 and #8 incubated for 3 h in half-strength MS with 10  $\mu$ M dexamethasone (Dex) or ethanol (EtOH) before irradiation for 2 h with narrowband UV-B (+) or without (-); means with SE;  $n=3$ .

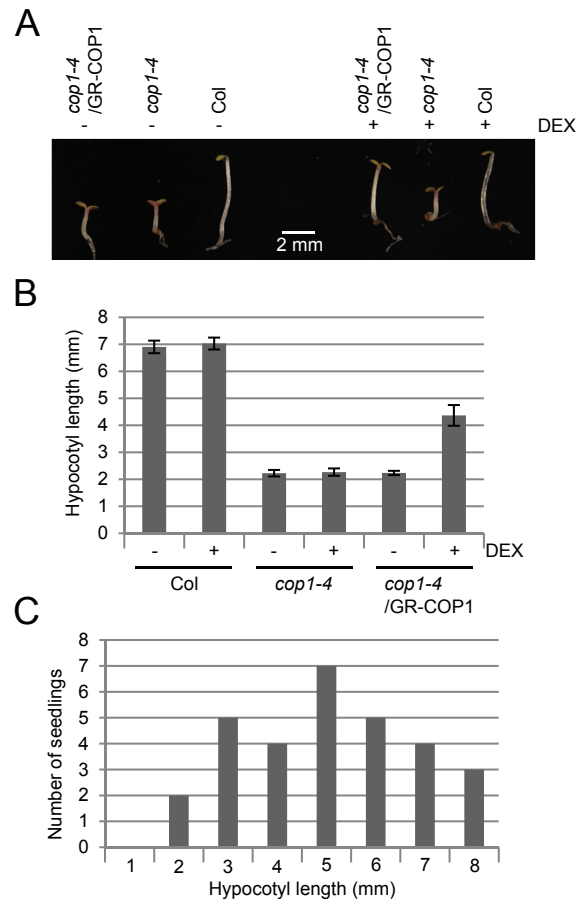

**Fig. S10.** Conditional partial complementation of *cop1-4* by *Pro<sub>35S</sub>:GR-COP1*. (A) Representative seedlings. (B) Hypocotyl lengths of 3-day-old dark-grown seedlings in the presence (+) or absence (-) of 25  $\mu$ M dexamethasone; means with SE,  $n=30$ . (C) Hypocotyl length distribution from the data in panel B.

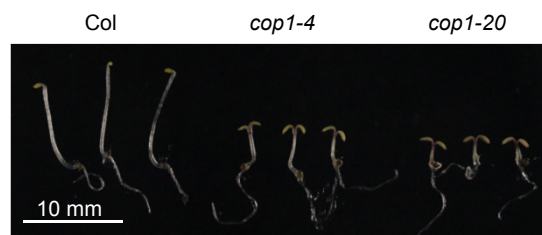

**Fig. S11.** Representative 4-d-old dark-grown seedlings of wild-type (Col), *cop1-4* and *cop1-20*.
